# Supplementary material
Source: publisher site journal article supplement (https://www.dovepress.com/article/557143)
Supplement: Supplementary file 1 [file 557143%20Supplementary%20Material.docx]

# Appendix A1

## Data extraction of 39 relevant studies

| **Authors/Date** | **Country** | **Participants** | **Research Design** | **Sample size** | **Aim** | **Main Findings** |
| --- | --- | --- | --- | --- | --- | --- |
| (Sillero, 2018) 45 | Spain | Nurses | Quantitative Research | 136 | To determine the influence of organisational factors of the perioperative nurse's work environment on the three burnout dimensions: emotional exhaustion, despersonalization, and personal accomplishment. | Promoting positive leadership styles, providing necessary resources, and creating a positive climate in the work environment can increase psychosocial well-being and decrease burnout among perioperative nurses. |
| (Patrick, 2006) 46 | Canada | Nurses | Quantitative Research | 126 | To examine the relationship between structural empowerment and perceived organisational support, and the effect of these factors on the role satisfaction of middle-level nurse managers. | Empowering conditions are associated with higher perceptions of support, and their combined effect predicts satisfaction. This relationship supports the idea that providing middle managers with resources, information, and opportunities fosters a sense of accomplishment and support, which is key to their role satisfaction and could help retain and attract leadership. |
| (Almutairi, 2022) 47 | Saudi Arabia | Nurses | Quantitative Research | 226 | To determine the relationship between managerial competence level and organisational commitment among nurses in Saudi Arabia. | Competent managers lead to greater organisational commitment. Nurse managers must understand the importance of managerial competence and demonstrate the need to improve educational quality to better meet care needs. |
| (Lorber, 2012) 48 | Slovenia | Staff nurses and unit/middle-level managers | Quantitative Research | 509 | To determine the level of job satisfaction of nursing professionals in Slovenian hospitals and the factors influencing job satisfaction in nursing. | Nurses in Slovenian hospitals report moderate job satisfaction, with key factors influencing this including management style, relationships with coworkers, and professional development opportunities. Results highlighted that leaders' managerial competencies have the greatest effect on employees’ job satisfaction. |
| (Hicks, 2010) 49 | USA | Radiological technologists | Quantitative Research | 87 | To gather feedback from radiologic technologists on their perceptions of how management skills affected their job performance, communication, and overall satisfaction as employees. | Supervisors' managerial skills play a vital role in employee satisfaction. The study highlighted four key management qualities: good communication skills, conflict management skills, the ability to teach staff, and corrective action skills. |
| (Clark, 2020) 50 | USA | Radiologic technologists | Quantitative Research | 520 | To determine the relationship between managers’ leadership styles (ie, transformational, transactional, and  laissez-faire) and job satisfaction as perceived by technologists in magnetic resonance (MR) imaging departments | To maintain motivated and satisfied technologists, MR managers should use transformational, transactional, or a combination of these leadership styles. Leaders with such traits and skills should be selected to manage MR departments and guide technologists. |
| (Shah, 2023) 51 | India | Nurses and Paramedical Staff | Quantitative Research | 345 | The goal of this research is to investigate the association among transformational leadership style, psychological capital, and job attitudes (job satisfaction and organisational commitment). | Transformational leadership increased employees’ job attitudes, organisational performance and psychological capital. Hence, health administrators should enhance managers' training to develop a culture of transformational leadership, clearly explain their aims to employees, and provide direction. |
| (Musinguzi, 2018) 52 | Uganda | All health workers | Quantitative Research | 564 | To examine the relationship between transformational, transactional, and laissez-faire leadership styles and motivation, job satisfaction, and teamwork of health workers in Uganda. | The more transformational the health facility manager was, the more motivated, satisfied, and team-spirited the health worker subordinates will be compared with those whose health facility managers were transactional or laissez-faire. |
| (Akdere, 2020) 53 | USA | Health care staff and customer/patient respondents | Quantitative Research | 3474: Employees  1,875: Customers/ patients | To explore the extent to which transformational leadership behaviors may be critical for organizational support for performance, learning, and human resource development human resource development culture | Transformational leadership positively impacts employee job satisfaction, and customer/patient satisfaction contributes to firm performance through the mediating roles of leader support for learning and performance and HRD culture. Therefore, organisations should support managers in developing TL behaviours. |
| (Durowade, 2020) 54 | Nigeria | Health managers | Quantitative Research | 396 | This study assessed leadership  styles and health workers’ job satisfaction in tertiary hospitals in Ekiti State, Nigeria. | Leadership styles significantly influence health workers' job satisfaction in tertiary hospitals in Nigeria. Transformational leadership positively correlates with job satisfaction, while laissez-faire leadership shows a negative relationship. To improve job satisfaction, the study recommends training healthcare leaders in transformational leadership and suggests exploring how a leader's age and tenure impact satisfaction. |
| (Jankelova, 2021) 55 | Switzerland | Nurses | Quantitative Research | 132 | To examine the connection between communication skills and the transformation style of first-line nurse managers (FLNMs) with the job satisfaction of nurses, and to verify the influence of three moderators (practice of managing FLNMs, the degree of control (span of control) and psychosocial work) on the strength of this relationship. | The communication skills and transformational leadership style of FLNMs are strong predictors of job satisfaction. Experience in managing FLNMs is not enough to perform management activities; specialised management training is needed for managers. |
| (Furtado, 2011) 56 | Portugal | Nurses | Quantitative Research | 266 | To describe nurse managers' leadership behaviors, comparing them with staff perceptions of their leaders leadership, and to determine if leadership components affect job satisfaction among staff nurses. | Leadership is a complex process that s inseparable from job satisfaction. The most frequently referenced competencies were interpersonal skills, management-specific training and integrity. Promoting effective leadership through formal training for nurse managers may lead to more satisfied nurses, better nursing care, and stronger leadership. |
| (Abdelhafiz, 2016) 57 | Jordan | Nurses | Quantitative Research | 200 | to explore how the leadership styles of nurse leaders affect job satisfaction among working nurses. | Transformational leadership behavior increases nurses’ job satisfaction and job retention. |
| (MeliÃ¡n-Alzola, 2020) 58 | Spain | ICU personnel | Quantitative Research | 248 | To analyse the role of hospital leaders and high-performance work practices (HPWPs) in intensive care units (ICUs) in organisational agility and its impact on healthcare personnel satisfaction. | The human dimension is a critical factor in achieving organisational agility, influencing both organisational performance and employee satisfaction. Leadership from top management and the implementation of HPWPs drive organisational agility. |
| (Widyana, 2019) 59 | Indonesia | Nurses | Quantitative Research | 107 | To identify the relationship between the managerial competencies of the head nurse and the job satisfaction of the respective nurses. | Senior leadership, teamwork, and turnover intention all significantly impact acute care nurses' perceptions of patient safety. Specifically, strong senior leadership support for safety and effective inter- and intra-professional teamwork were positively correlated with better patient safety perceptions, whereas high turnover intention was associated with lower safety perceptions. The study concludes that organisations should invest in leadership training and teamwork initiatives, and address factors that contribute to high turnover, to improve patient safety. |
| (Babaeipour-Divshali, 2016) 60 | Iran | Nurses | Quasi-experimental study | 60 | To investigate the effect of the Head Nurse Empowerment Program (HNEP) on the job satisfaction of nurses. | An empowerment program for head nurses is an effective strategy to improve staff nurses' job satisfaction. By enhancing head nurses' management capabilities, hospitals can foster a more supportive and empowering environment, leading to greater staff satisfaction. |
| (Sellgren, 2008) 61 | Sweden | Nurses and Administrative staff | Quantitative Research | 426 | This study examines how nurse managers' leadership behavior relates to job satisfaction and a creative work climate. | Managers perceived as super leaders positively influence staff job satisfaction. It is essential that managers develop their leadership behaviour to become a ‘‘super’’ leader who cares about their employees, considers productivity, and knows how to handle change. |
| (Perkins, 2023) 62 | USA | Nurses | Quantitative Research | 83 | To explore the relationship between the roles of nursing leadership and their influence on the millennial psychiatric nurses’ level of job satisfaction and intent to leave. | Managers who played the roles of mentor, director, and monitor had higher employee job satisfaction and improved job retention. Leaders should focus on strengthening their mentor and monitor roles and transition from a coordinator to a director approach. |
| (Reshidi, 2023) 63 | Saudi Arabia | Nurses | Quantitative Research | 716 | To establish the pertinence of nursing leaders' behaviours in shaping the perceptions and job satisfaction levels of nursing professionals. | Nursing leaders' behaviours significantly influence nurses' perceptions and job satisfaction by creating either a supportive or a stressful work environment. Specific leadership actions, such as fostering autonomy, providing support, encouraging professional growth, and using positive reinforcement, led to improved job satisfaction, reduced burnout, and enhanced performance, whereas a lack of these actions can lead to stress and dissatisfaction. |
| (Suprapto, 2023) 64 | Indonesia | Nurses | Quantitative Research | 136 | This study aims to advance human resources in facing external and internal environmental changes, by educating nurses to focus on different hospital human resource development indicators that affect patient or customer satisfaction. | Training significantly affects nurses' job satisfaction. Nurses must optimise their abilities and competencies to raise the standard of nursing care. Nursing directors are essential in building, recruiting, and measuring nurse competencies. |
| (Sarıköse, 2020) 65 | Turkey | Nurses | Quantitative Research | 300 | To determine the innovativeness levels of nurses and to examine the impact of transformational leadership and demographic and occupational variables on individual innovativeness in nurses. | Having higher levels of education, positions, leadership skills, and expectations from management positively affected nurses’ individual innovation. |
| (Kodama, 2016) 66 | Japan | Nurses | Quantitative Research | 396 | To determine if nurse managers’ leadership style is related to Japanese staff nurses’ affective commitment to their hospital | The intellectual stimulation aspect of transformational leadership increases staff nurse retention by enhancing affective commitment. This suggests that encouraging staff to think creatively and challenge norms can improve their emotional attachment to the hospital. |
| (Sahraei Beiranvand, 2021) 67 | Iran | Nurse managers | Quantitative Research | 384 | To explain the effect of authentic and ethical leadership on the psychological empowerment of nurses. | Authentic and ethical leadership positively impacts nurses' psychological empowerment by fostering a sense of self-efficacy, meaning, and autonomy. Ethical leadership creates a safe and trustworthy environment by promoting transparency and fairness, while authentic leadership involves leaders acting with integrity and being self-aware, which in turn, empowers nurses by making them feel respected and valued. |
| (Nichols, 2016) 68 | USA | Housekeepers and dietary service workers | Quantitative Research | 270 | Examine the relationship between supervisor support and turnover intent, and assess the mediating role of affective commitment between supervisor support and intent to turn over. | Frontline supervisors who provide supportive supervision can improve their staff's affective commitment, which is critical for reducing turnover among frontline health care workers. Upper management should provide specific training for frontline supervisors on how to provide supportive supervision to workers. |
| (Zaheer, 2019) 69 | Canada | Frontline nurses, allied health professionals  (AHPs), and clerical staff | Quantitative Research | 183 | To examine how nurses’, allied health professionals’, and clerical staff’s perceptions of immediate supervisor, teamwork, and mindful organising impact their turnover intentions. | Supervisor support is instrumental in increasing employees' affective commitment to the organisation, thereby decreasing their intent to leave. Support from a supervisor can lead to a stronger emotional attachment and loyalty to the hospital, making employees less likely to want to quit. |
| (Brunetto, 2011) 70 | Australia | Nurses | Quantitative Research | 1064 | Use the structural and relational dimensions of social capital theory as a lens to examine the impact of the supervisor–subordinate relationship on nurses’ perceptions of the usefulness of their workplace networks, sociability, and affective commitment. | Strong supervisor-subordinate relationships positively impact a nurse's ability to solve problems and improve commitment by improving access to information, resources, and decision-making authority. This, in turn, fosters job satisfaction and a sense of empowerment. |
| (Fleig-Palmer, 2015) 71 | USA | Clincians | Quantitative Research | 153 | To examine the impact of interpersonal mentoring on affective organisational commitment and the potential moderating effect of affective commitment in the knowledge transfer retention-relationship. | Interpersonal mentoring plays an important role in clinician retention by positively influencing affective commitment. Health organisations must facilitate cultures that show top management support for mentoring through practices such as educational programs, flexible scheduling, and reward systems. |
| (Maffoni, 2020) 72 | Itali | Healthcare staff working in neuro-rehabilitation medicine unit. | Quantitative Research | 222 | To analyse whether managerial support and ethical vision of patient care would be related to emotional exhaustion directly or through moral distress, and whether these relationships would be conditional on individual levels of positive affectivity and resilience. | An ethical climate serves as a protective factor against moral distress and emotional exhaustion. Health organisations must consider developing strategies to improve the ethical climate, enhance managers’ ability to support teams in dealing with ethical issues, and foster employees’ positive affectivity and resilience. |
| (Laschinger, 2015) 73 | Canada | New graduate nurses | Quantitative Research | 1009 | This study tested a model linking authentic leadership, areas of worklife, occupational coping self-efficacy, burnout, and mental health among new graduate nurses. | Authentic leaders play an important role in creating working conditions that optimise the match between nurses’ expectations and the reality of the work environment and strengthen new nurses’ confidence in their ability to cope with the demands of their jobs, thereby protecting them from burnout development and poor mental health. Leadership training to develop supervisors’ authentic leadership skills can be a useful strategy for cultivating healthy work environments that promote occupational self-efficacy and encourage retention. |
| (Lewis, 2009) 74 | UK | Nurses | Qualitative Research | 41 | To identify the specific management behaviours associated with the effective management of stress in nursing, and to build a stress management competency framework that can be integrated and compared with nurse management frameworks. | The study highlights that managers play a crucial role in reducing and managing workplace stress. Effective management behaviours include managing workload and resources, providing individual consideration, and using a participative approach. A competency framework was developed from these findings and offers a practical tool for assessing management skills, training, and development in stress management. |
| (Rollins, 2021) 75 | USA | Mental Health Clinicians | Qualitative Research | 40 | This study sought to elaborate on the organisational influence of burnout and work engagement on mental health. | Findings highlight several organisational-level interventions that can reduce burnout and improve work engagement, including promoting a work culture that prioritises person-centred care over productivity and other performance metrics, robust management skills and practices and opportunities for employee professional development and self-care. |
| (Aboramadan, 2021) 76 | Jordon | Medical Staff | Quantitative Research | 380 | To propose a model of the effect of both authentic leadership and management capability on hospital performance. | Management capability and effective authentic leadership lead to increased work engagement and better performance. Hospitals should encourage and develop a climate of authentic behaviours among health-care leaders. This can be promoted through effective HR practices and policies, recruiting and selecting leaders with authentic traits, coaching, training, and performance appraisal of authenticity in medical leaders. |
| (Kristensen, 2016) 77 | Denmark | Healthcare staff working in the psychiatric department. | Experimental Research | 358 and 325 staff members participated before and after the intervention. | To investigate staff’s perceptions of patient safety culture in a Danish psychiatric department before and after a leadership intervention. | Leadership knowledge and skills are pivotal to improving the Patient Safety Culture (PSC). Leaders need to acknowledge their role in building a safe and caring culture, understand the nature of the safety culture in their unit, and recognise when and how improvement is necessary. Intervention programs should be tailored to local needs in terms of content and learning approaches. |
| (Nayeri, 2006) 78 | Iran | Nurses | Qualitative Research | 26 | To highlight nurses’ perceptions of their own productivity and factors affecting it. | Managers who are aware of nurses’ viewpoints can create the conditions to achieve higher productivity levels by enabling the staff and also by identifying and promoting productive work practices among clinical staff. |
| (Vainieri, 2019) 79 | Itali | n/a | Quantitative Research | Not mentioned | To investigate the relationship between top management competencies, information sharing, and organisational performance in the public health care system and to look at the management role in assuring information sharing on organisational strategies to achieve professionals’ engagement. | Managerial competencies are positively associated with organisational performance. Systematic information sharing process regarding performance results, goals, and organisational structure provided by top management is an effective strategy to engage professionals. |
| (Al-Hussami, 2017) 80 | Jordan | Nurses | Experimental study | 61 | To examine the effects of leadership competencies and quality of work on the perceived readiness for organisational change among nurse managers. | A competent nurse manager enhances nurses' readiness for change, which, in turn, supports constructive change processes. A leadership guidance program should be implemented for nurse managers. Healthcare policymakers must focus on improving leadership competencies and the overall satisfaction of nurse managers to support changes in hospitals and foster learning organisations. |
| (Mortier, 2016) 81 | Belgium | Nurses | Quantitative Research | 360 | To examine the relationship between perceived authentic leadership and two dimensions of thriving (learning and vitality) among nurses, and to study the mediating role of empathy in this relationship. | Empathetic nurse managers seem to increase their nurses' vitality. Training nurse managers in authentic leadership skills is important for the nursing field, as these skills help them better express empathy and, consequently, foster thriving in nursing. |
| (Zaheer, 2021) 82 | Canada | Frontline nurses, allied health professionals, and clerical staff | Mixed Methods Research | Survey: 185 participants  Interview: 15 participants | To examine how nurses’ perceptions of senior leaders, immediate supervisors, teamwork and turnover intention impact their perceptions of patient safety.  . | Positive perceptions of senior leadership support were directly linked to higher perceived patient safety. Leadership practices associated with better outcomes included clear communication, inclusive policymaking, and being visible on the frontlines. It is essential that healthcare organisations dedicate resources to strengthening their leaders' relational competencies. |
| (Kok, MC, 2018) 83 | Ethiopia, Kenya, Malawi and Mozambique | Community health care workers | Mixed Methods Research | 153: in-depth interviews.  278: Questionnaires administered post-intervention, and again after 1 year. | To assess the effect of the supervision intervention on CHWs’ perceptions of supervision and CHW motivation-related outcomes. | Training supervisors in supportive supervision and subsequent implementation of group supervision can improve employee motivation and performance. Supportive supervision reduces staff turnover and improves knowledge, motivation, and teamwork. |
